# Supplementary material for: Highly active heterogeneous Fenton catalyst using iron oxide nanoparticles immobilized in alumina coated mesoporous silica
Source: Royal Society of Chemistry journal article supplement (doi:10.1039/b513517f), 2006-01-01
Supplement: b513517f.pdf [file b513517f.pdf]

*Electronic Supplementary Information for*

**Highly Active Heterogeneous Fenton Catalyst Using Iron Oxide Nanoparticle  
Immobilized in Aluminum Coated Mesoporous Silica**

Hacgyu Lim,<sup>a</sup> Jinwoo Lee,<sup>b</sup> Sunmi Jin,<sup>b</sup> Jaeyun Kim,<sup>b</sup> Jeyong Yoon<sup>a\*</sup> and  
Taegwhan Hyeon<sup>b\*</sup>

<sup>a</sup> School of Chemical and Biological Engineering, Seoul National University, Seoul, 151-744, Korea. E-mail: jeyong@snu.ac.kr

<sup>b</sup> National Creative Research Initiative Center for Oxide Nanocrystalline Materials and School of Chemical Engineering, Seoul National University, Seoul 151-744, Korea.

Fax: 82-2-886-8457; Tel: 82-2-880-7150; E-mail: thyeon@plaza.snu.ac.kr

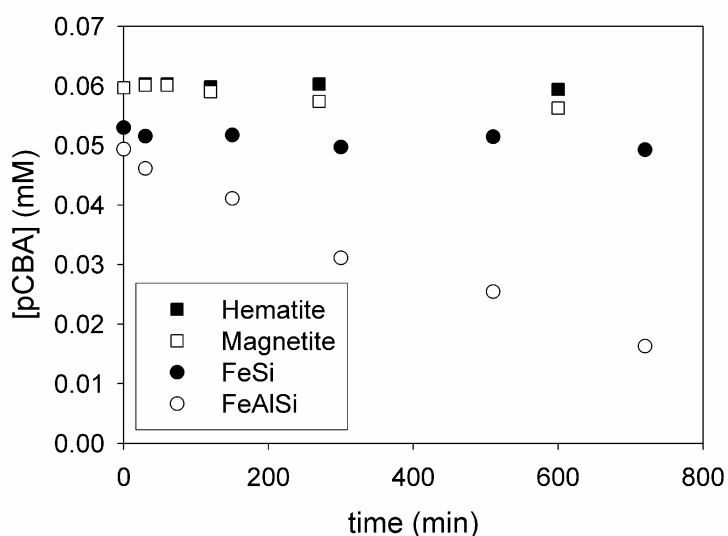

**Fig. S1** Degradation of *p*CBA with (■) hematite, (□) magnetite, (●) FeSi, and (○) FeAlSi

The *p*CBA degradation experiments for Fig. S1 and S2 were conducted at 25 °C in the presence of 0.1 g/l of catalyst particles. The initial concentration of H<sub>2</sub>O<sub>2</sub> was 5 mM. The solution pH was adjusted to 4.1 and kept within 0.2 pH units of this value with HClO<sub>4</sub> and NaOH during the experiments.

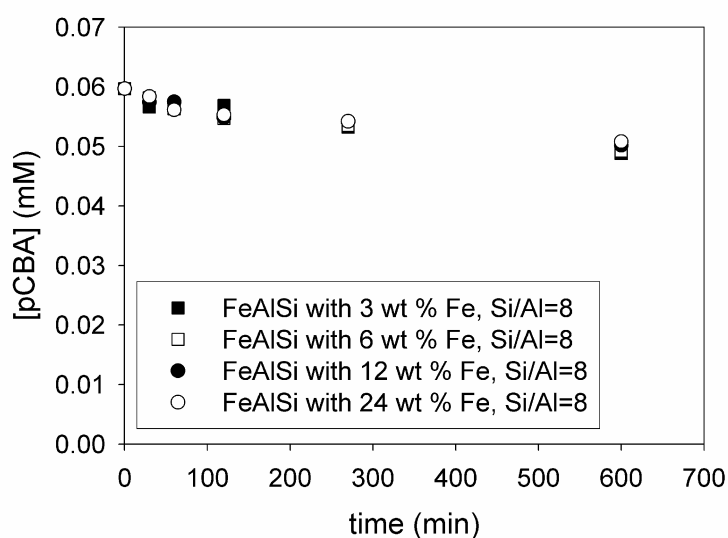

**Fig. S2** Degradation of *p*CBA with FeAlSi (with varying Fe content from 3 to 24 wt %)

When the alumina content was low (Si/Al=8), the increasing Fe content from 3 to 24 wt % hardly affected the degradation rate for *p*CBA. Considering the H<sub>2</sub>O<sub>2</sub> decomposition result in Table 1, this data seems to support the effect of the association of alumina with iron oxide.
